# Supplementary material for: Anti-inflammatory effects of PGE2 in the lung: role of the EP4 receptor subtype
Source: HighWire-hosted journal article supplement (doi:10.1136/thoraxjnl-2014-206592), 2015-05-04

### Supplementary Figure 1: EP receptor expression in the innate model

Panels depict the EP<sub>1-4</sub> receptor mRNA levels in the lung tissue from mice challenged with aerosolised saline or LPS (1 mg/ml) for 30 minutes. Data shown is mean  $\pm$  s.e.m., n = 8.

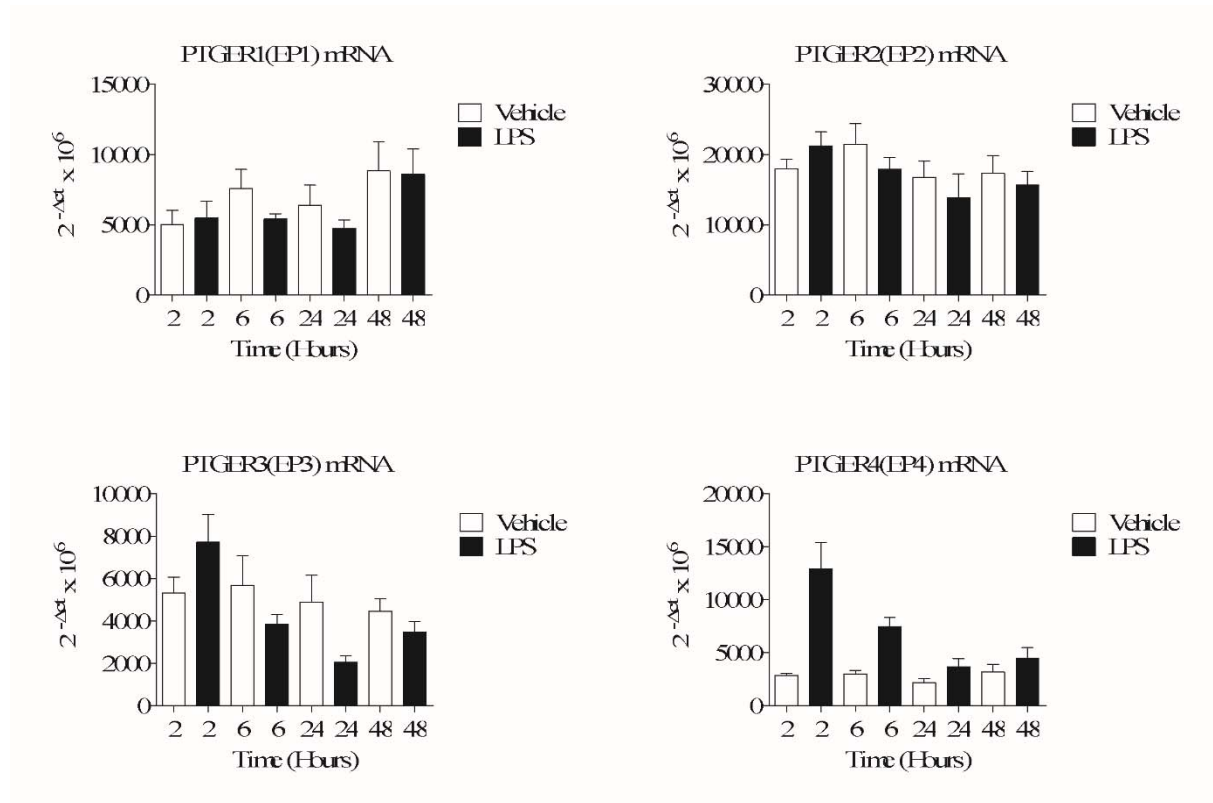

### Supplementary Figure 2: EP receptor expression in the allergic model

Panels depict the EP<sub>1-4</sub> receptor mRNA levels in lung tissue from sensitised mice challenged with intranasal saline or OVA once a day for 3 days. Data shown is mean  $\pm$  s.e.m., n = 8.

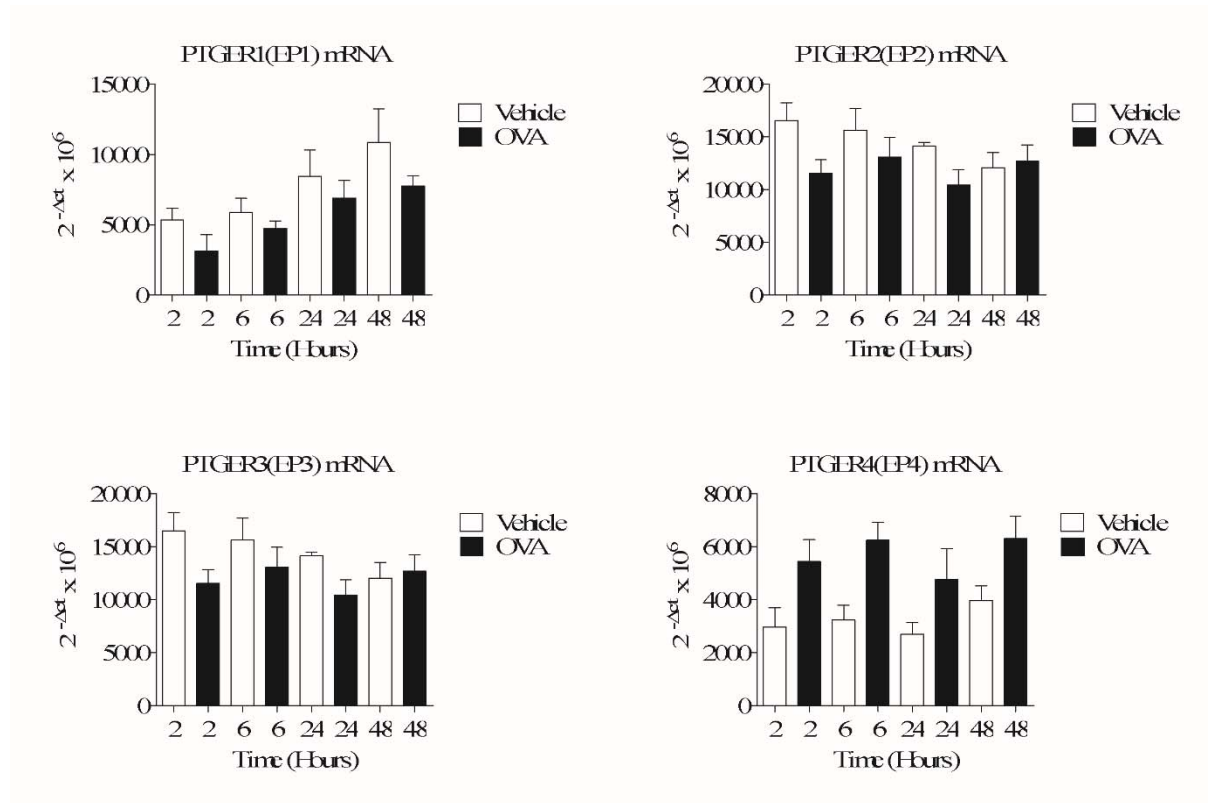

### Supplementary Figure 3: Effect of selective EP receptor agonists on basal cytokine release

Effect of increasing concentrations of EP receptor agonists (EP<sub>1</sub>: ONO-D1-004), EP<sub>2</sub>: ONOAE1-259), EP<sub>3</sub>: ONO-AE-248, EP<sub>4</sub>: ONO-AE1-329 on TNF $\alpha$  (A-D) and IL-6 (E-H) levels in culture medium from unstimulated human (THP-1) monocytes. Data shown is mean  $\pm$  s. e. m.

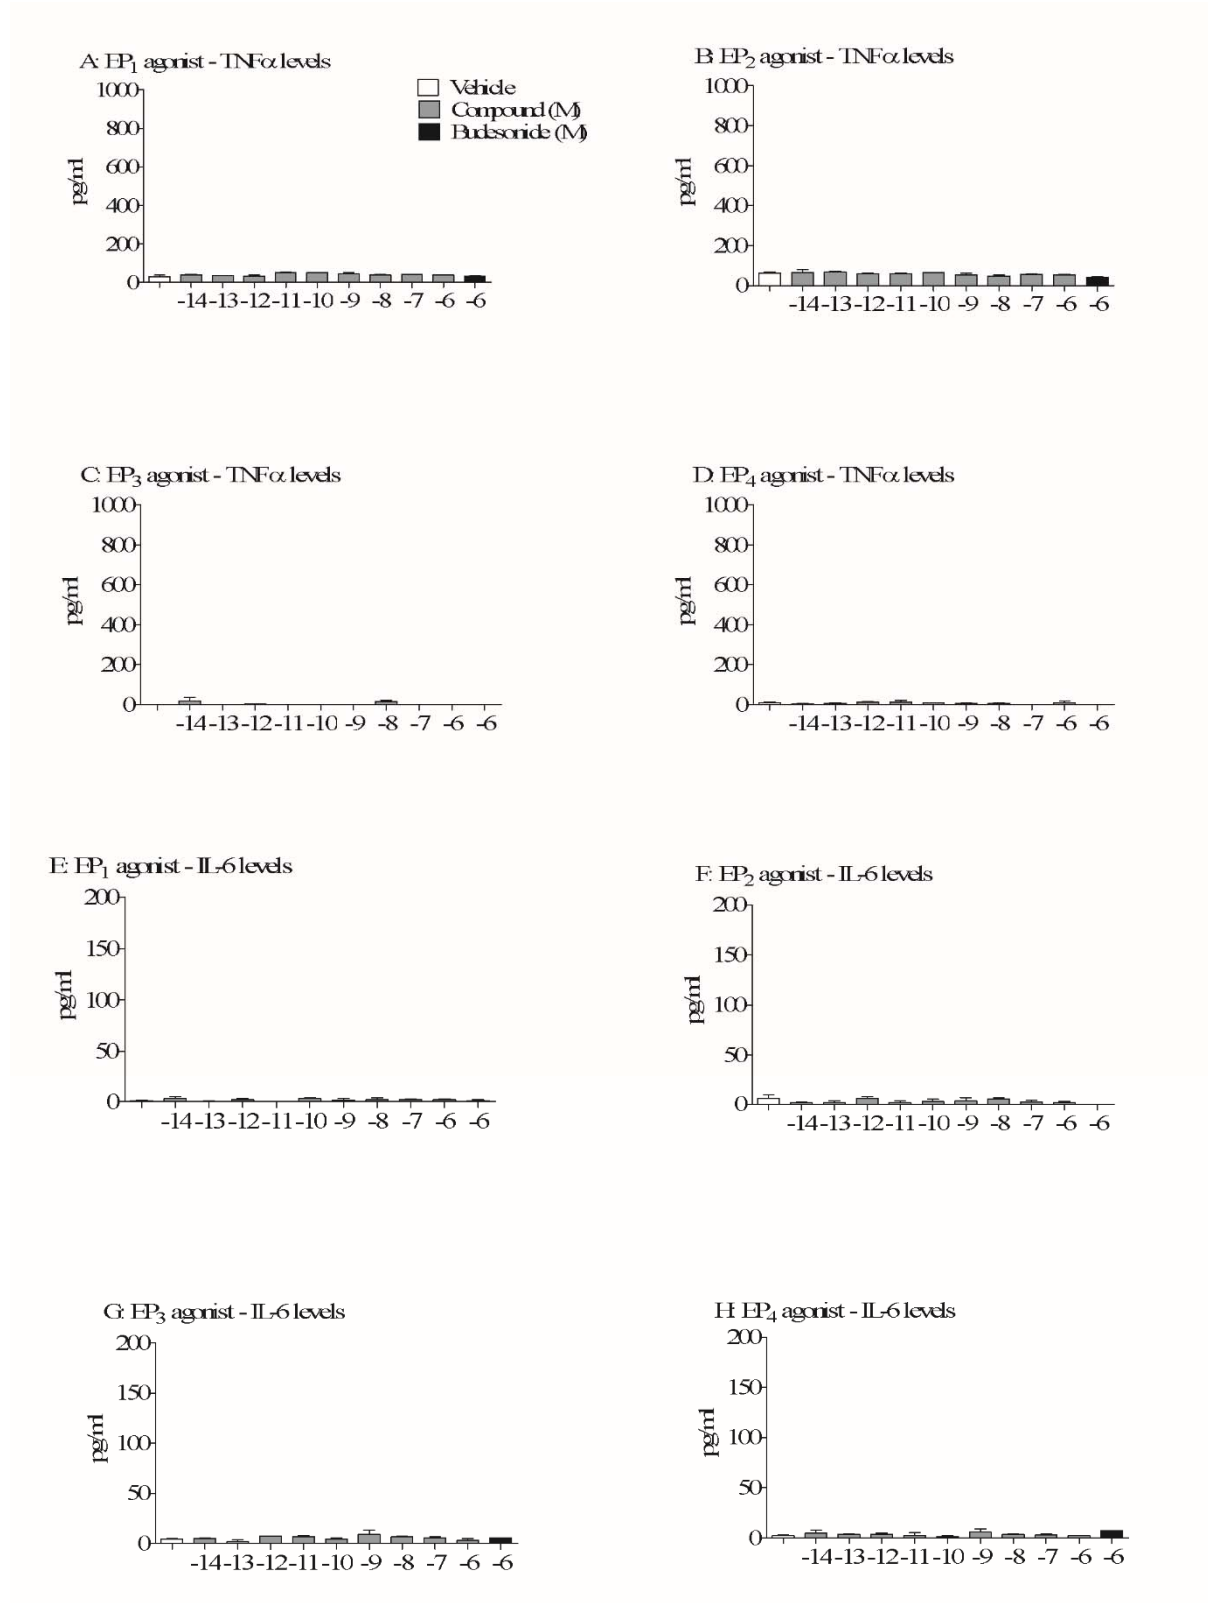

### Supplementary Figure 4: EP receptor expression in human monocytes/macrophages

Panels depict the EP<sub>1-4</sub> receptor mRNA levels in THP-1 cells (A) of human alveolar macrophages (B). Data shown is mean  $\pm$  s.e.m., n = 3-6.

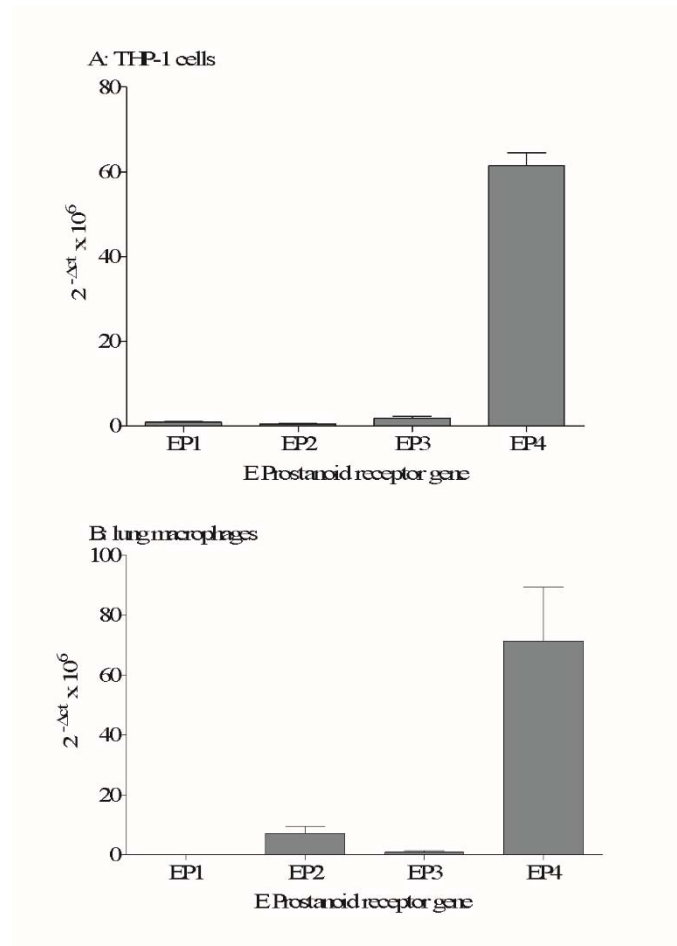

Supplement: thoraxjnl-2014-206592supp_figures.pdf [file thoraxjnl-2014-206592supp_figures.pdf]
